# Supplementary material for: Feasibility and Safety of a Home-based Electroencephalogram Neurofeedback Intervention to Reduce Chronic Neuropathic Pain: A Cohort Clinical Trial
Source: PubMed Central journal article supplement — Arch Rehabil Res Clin Transl. 2024 Aug 10;6(3):100361. doi: 10.1016/j.arrct.2024.100361 (PMC11447531; doi:10.1016/j.arrct.2024.100361), 2024-08-10
Supplement: mmc1.pdf [file mmc1.pdf]

## Would you be interested in taking part in research focused on exploring the feasibility and safety of undertaking a home-based neurofeedback training programme for people living with chronic neuropathic pain?

We are seeking 10 volunteers, who would be interested to take part in this clinical trial over a 30 week time period.

This comprises 3 phases –

Phase 1: A 4 week baseline measurement pre-intervention phase

Phase 2: An 8 week active neurofeedback intervention phase

Phase 3: A 12 week post-intervention follow up measurement phase

The eligibility criteria for taking part in this research are as follows:

- You are at least 18 years old
- You have experienced chronic neuropathic pain for 3 months or more of severe intensity, which must be rated on the Visual Analogue Pain Scale as being greater than 5 /10
- You must have had an average pain rating in the last week (prior to screening) of equal to or more than 5/10 rated on the Brief Pain Inventory outcome scale
- You must have a head circumference measurement of between 520 and 620 mm to enable a comfortable fit and wearing of the Headset device
- You must have access to broadband wifi at home

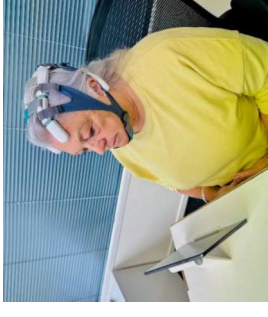

If you are interested and would like more information on how to potentially take part, then please kindly contact any of the following members of the research team: Professor & Dr Mohamed Sakel, MRCP, FRCP, UK (Chief Investigator) Email: [msakel@nhs.net](mailto:msakel@nhs.net) Telephone: 01227-868698 Mr Sashi Kommu, FEBU, FRCS (Urol) (Co-Principal Investigator) Email: [s.kommu@nhs.net](mailto:s.kommu@nhs.net) Telephone: 01227-783112 Karen Saunders (Co-investigator) Email: [karen.saunders10@nhs.net](mailto:karen.saunders10@nhs.net)
